# Supplementary material for: Novel regulatory cascades controlling expression of nitrogen-fixation genes in Geobacter sulfurreducens
Source: PubMed Central journal article supplement — Nucleic Acids Res. 2010 Jul 25;38(21):7485–99. doi: 10.1093/nar/gkq652 (PMC2995071; doi:10.1093/nar/gkq652), 2010-07-25
Supplement: supp_gkq652_Ueki_supplement_revision.pdf [file supp_gkq652_Ueki_supplement_revision.pdf]

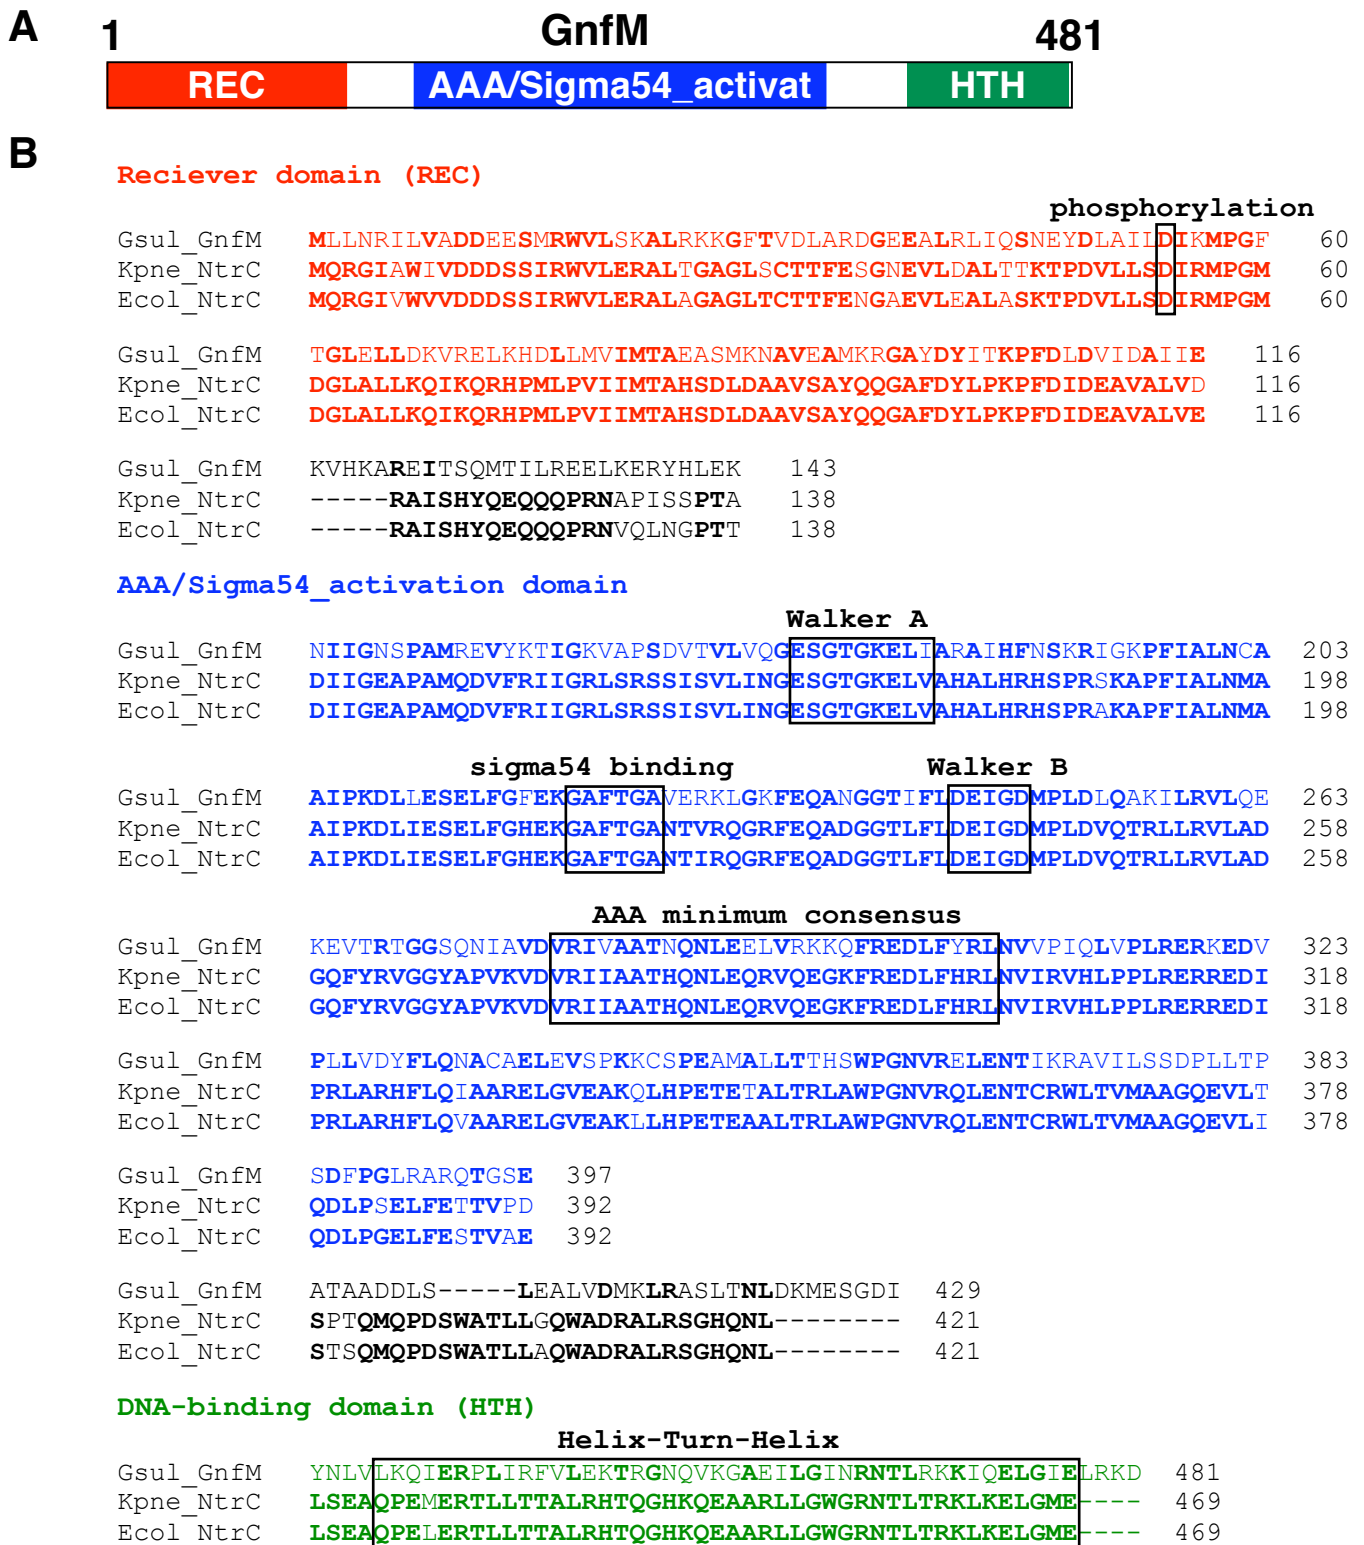

**Figure S1.** GnfM. (A) Domain organization of GnfM. (B) Comparison of *G. sulfurreducens* GnfM with NtrC. *G. sulfurreducens* GnfM (Gsul, GenBank accession number, AAR34331) and NtrC homologues from *Escherichia coli* (Ecol, AAC76866) and *Klebsiella pneumoniae* (Kpne, CAA26923) are aligned. The boxes contain the conserved regions found in the EBP family containing the receiver domain, including the phosphorylation site, the Walker A and B motifs, the GAFTGA sigma54 binding motif, the AAA minimum consensus, and the helix-turn-helix motif (1).

```

Gsul  M-----TTEEKKEEFLATVIDSVGDGVIVIDLDGRIALMNPAAEEISGISRRQAV
Gmet  M-----SPESPNEAFLATIIDSVDGIVIVIDLGGRITLMNPAAEEIIAISRRQAM
Gura  V-----TTEHLQEYYANIIDSVDGIVIVLDIQGVIITLLNPAAEEIAGISRRQAK
Rcap  M---NLPPP-----GIWNSLPLPALMLDVNDRVIEINPAAELFLNLSARALK
Kpne  MATGTLPDA-----GQILNSLINSILLVDDDLAVHYANPAAQQLLAQSSRKLF
Ecol  MATGTQPD-----GQILNSLINSILLIDDNLAHYANPAAQQLLAQSSRKLF

Gsul  GHRFALVFHREAVLREMVGKTATSGMTISDHE-NIVIRKQKQL-TPVSAATTFPLMLPHGE
Gmet  GHPFAALLGSQELLVDMVAKTAATGMTISDNE-NIVIRKAKQL-TPVAVTTFPLLRQDGE
Gura  GAHFSALFKGEDILLEMVNKTAATGMTISDHE-NIVLKM TGRL-IPISATTSPLLMANGE
Rcap  GQALGERLAISAPLEEIFARVRKNRSALFVNDVDLTTGERAPVQCNLQAAPIA---DDPE
Kpne  GTPLPELLSYFSLNIGLMQESLAAGQGFTDNEVTLVIDGRSHI-LSLTAQRLP-----
Ecol  GTPLPELLSYFSLNIELMQESLEAGQGFTDNEVTLVIDGRSHI-LSVTAQRMP-----

Gsul  TTGTILVLRDITSIRELEDAVRNADRLSTLGTLAAGLAHEIKNPLGGIKGAAQLLELELP
Gmet  PIGTILMLRDLTNIRELEDAVRHADRLSTLGTLAAGLAHEIKNPLGGIKGAAQLLEMELP
Gura  RIGTILILRDLTNIRELEEA VRQADRLSTLGALAAAGLAHEIKNPLGGIKGAAQLLEMELP
Rcap  TVLLLIISPRIADRLGRASMVKSAARSAGIG-MAEMLAHEIKNPLAGIAGAAQLLSMGLS
Kpne  EGYILLEMAPMDNQRRLSQEQQLQHAQQIAARDLVRGLAHEIKNPLGGLRGAAQLLSKALP
Ecol  DGMILLEMAMPMDNQRRLSQEQQLQHAQQVAARDLVRGLAHEIKNPLGGLRGAAQLLSKALP

Gsul  TESELRDNRVIMLKEVERVNRIVEELLALASPRGLQLSKVNLHKVIGDILTQKRSTEGK
Gmet  PESELRDNRVVREVDNRVNRIVEELLALSSPRKLQTKVNLHKILGDIVTLRKRATEGK
Gura  DNAELRDCTRVMLEKQVRVNRIVEELLELASPRKLDLTKVNLHKILGDIILLQKRTVDDR
Rcap  GED--LELTDLIVDETRRIVKLLLEQVEQFGNVRPPEMKPVNIHDVLD RARKSAGVGFGA-
Kpne  DPA-LMEYTKVIEIQADRLRNLVDRLLGPQHP-GMHVTE-SIHKVAERVVKLVSMELPD-
Ecol  DPS-LLEYTKVIEIQADRLRNLVDRLLGPQLP-GTRVTE-SIHKVAERVVTLVSMELPD-

Gsul  NVAFQQQFDPSIPPILADEGLLTQLEFLNLVKNAMAEVDDG-GCIRVASRVISDY SMTQK-
Gmet  SVTFQQQFDPSIPPILADEGLLTQLEFLNLIKNAVEAVDER-GTIRVASRVLSDY SMTPK-
Gura  RVTFQQHFDPSPILADEALLTQLEFLNLIKNAVEAVGAV-GLIKVSSRVLADY SMTQK-
Rcap  HMLIVEDYDPSVPTLGDADQLTQVFLNLLKNASEAAKGQ-GTIRL--RTFYDYALRLRR
Kpne  NVKLVRDYDPSLPELPHDPDQIEQVLLNIVRNALQALGPEGGEITL--RTRTAFQLTLH-
Ecol  NVRLIRDYDPSLPELAHDPDQIEQVLLNIVRNALQALGPEGGEIIL--RTRTAFQLTLH-

Gsul  --GERRSRMVAIDVADDGPGIPPERLEQLETPFFTTTKTKGTGLGLAICQKIVTEHRGMK
Gmet  --GERRSRMVAIDVDDGPGIPREQLEQLETPFFTTKAKGTGLGLAICQKIVTEHRGMLK
Gura  --GGRSRMVAIEVSDDGPGILKEQLEHLETPFFYTTKAKGTGLGLAICHKIVA EHRGMIR
Rcap  PDGGGS AVPLQVEVIDDGP GIPADIASSIFEPFVSGRENGTGLGLALVSKIISEHNGWIS
Kpne  --GVRYRLAARIDVEDNGPGIPSHLQDTLFYPMVSGREGGTGLGLS IARSLIDQHS GKIE
Ecol  --GERYRLAARIDVEDNGPGIPPHLQDTLFYPMVSGREGGTGLGLS IARNLIDQHS GKIE

Gsul  VESYPGKGTTFVMLPLIQ---
Gmet  VESDPGTGTTFVMLPLIQ---
Gura  VDSEPTKGTTFVMLPLIQ---
Rcap  VESAPGR-TLEFRISLPVAPKEL
Kpne  FTSWPGH-TEFSVYLP IRK---
Ecol  FTSWPGH-TEFSVYLP IRK---

```

**Figure S2.** Comparison of GnfL homologues with NtrB. GnfL homologues from *G. sulfurreducens* (Gsul, GenBank accession number, AAR34331), *G. metallireducens* (Gmet, ABB32781), and *G. uraniireducens* (Gura, ABQ25121), and NtrB homologues from *Escherichia coli* (Ecol, AAC76866), *Klebsiella pneumoniae* (Kpne, CAA26923) and *Rhodobacter capsulatus* (Rcap, CAA51074) are aligned. NtrB homologues have a PAS domain at the N-terminus. A putative autophosphorylation site is indicated by an asterisk.

Gsul **E**VELL**K**EQ**V**ED**L**KE**T**LE**S**RK**I**VE**K**AK**G**IL**M**Q**N**Q**L**TE**P**EA**F**R**K**M**Q**KL**A**MD**K**R**K**S**M**R**Q**IA**E**A**I**LL**T**EA  
 Gmet **E**VET**L**KE**E**V**E**D**L**KE**I**LE**S**RK**V**IE**K**AK**G**V**L**M**R**N**Q**GL**S**E**P**EA**F**RR**M**Q**K**L**A**MD**K**R**K**S**M**R**Q**IA**E**A**I**LL**T**E  
 Gura **E**ID**E**L**K**EQ**V**ED**L**KE**T**IE**S**RK**V**IE**K**AK**G**V**L**M**R**T**Q**GL**S**E**P**EA**F**R**K**M**Q**KL**A**MD**K**R**K**S**L**R**Q**IA**D**A**I**LL**T**ES  
 Ppro **E**VD**G**L**K**E**K**I**D**D**L**RE**V**IE**N**R**K**I**I**E**R**A**K**G**M**L**M**ET**E**R**L**S**E**A**D**A**Y**R**T**L**Q**K**M**A**M**D**K**R**K**T**L**R**Q**V**A**D**S**I**L**K**S**A**K**  
 Paer **E**MA**K**L**K**Q**K**T**E**Q**L**Q**D**R**I**A**G**Q**A**R**I**N**Q**A**K**V**L**L**M**Q**R**H**G**W**D**E**R**E**A**H**Q**H**L**S**R**E**A**M**K**R**R**E**P**I**L**K**I**A**Q**E**L**L**G**N**E**P**S**A  
 Kpne **E**L**Q**Q**L**S**G**Q**L**A**S**L**K**D**A**L**E**E**R**K**L**I**E**K**A**K**S**V**L**M**T**Y**Q**G**M**Q**E**E**Q**A**W**Q**A**L**R**K**M**A**M**D**K**N**Q**R**M**V**E**I**A**R**A**L**L**T**V**K**A**L**W**R**V**T**P**K

**Figure S3.** GnfR. The C-terminal ANTAR domains of GnfR homologues are compared with those of known antiterminators. GnfR homologues from *G. sulfurreducens* (Gsul, GenBank accession number, AAR36216), *G. metallireducens* (Gmet, ABB30902), *G. uraniireducens* (Gura, ABQ25350), and *P. propionicus* (Ppro, ABL01052), and AmiR from *P. aeruginosa* (Paer, CAA32023) and NasR from *K. pneumoniae* (Kpne, AAA25101) are aligned.

```

                                     -24           -12
Gsul_nifH  TTGCTTGCCTGTAAAGCTTAGTTAATTCAGTGTGTTGCTGGTTGGCATGGACGGTGCTAT
Gmet_nifH  GGGGAAGGAGCAAAGTCAAGTAATTACAATGGGTTGATTTTTGGCACGGTCAGTGCTTT
Gura_nifH  TCTGTGAAATAAAAAGTCCGTCATTTCAGCTTGTTAGCAGTTGGCATGGTCAATGCTAA
                                     ***      ** * * **      ***      ***** * * * *****
                                     +1
Gsul_nifH  ACCACTATCAAACATACAGACGA-----GAATACGCCGGAGTATTCG----CTGCTGAA
Gmet_nifH  ATCTGTTTCAAAT-CAATAACGA-----GAATACGCCGGAGTATTCG----CTGCTGAA
Gura_nifH  AGTAAAGCCATACATCATAGCGATGATCTGAATACGCTGCGGTATTCGACTATTATATGT
          *      ** *      ***      ***** *      *****      *
Gsul_nifH  CGCAGGCAAGGGCGCCACCATTAAACGGAAATGGGGCGCCTTTTTTTGTTGCCCCGAACAT
Gmet_nifH  CGCAGGCAAGGGCGCCACCAATAT-CACCATTGGGGCGCCTTTTTTTGTTGCCCCGCAAAC
Gura_nifH  CACAGGCAAAGGGCGCCACCATAAT---TCAATGGGGCGCCTTTTTTTGTTGCCCCGAAAAT
          * ***** ***** *      * ***** ***** * *
Gsul_nifH  TCCCAGGCAGTCCACGGATTGGTGGACGAAAGGAGACAGGACATG
Gmet_nifH  CATTAGAGGCTC----AGACCCAGGGCGAAAGGAGAAACATATG
Gura_nifH  TCACTTGCGGTCCACAGATTAGTGGACGAAAGGAG-CAGAACATG
          **      ** ***** *      *****

```

**Figure S4.** Alignment of the 5' untranslated regions of *nifH*. The putative transcription termination signals are highlighted in grey. Highly conserved dinucleotides GG and GC in RpoN-dependent -24/-12 promoter elements are indicated by bold letters. The transcription initiation site for *Gsul\_nifH* is indicated in bold by +1. Translation initiation codon, ATG, is underlined with bold letters. *Gsul*; *G. sulfurreducens*, *Gmet*; *G. metallireducens*, *Gura*; *G. uraniireducens*.

(A)

RpoD; CTAGATTC**TTGACA**TAAAAGTGGTATTAAAG**TACTTA**TTTACTCAAAG  
TAAGAACTGTATTTTCACCATAATTTTCATGAATAAATGAGTTTCCTAG

RpoD-TTS (WT) ; CTAGATTC**TTGACA**TAAAAGTGGTATTAAAG**TACTTA**TTTACTCAAAGA**AAGGGCGCCACCATTAAACGGAAATGGGGCGCCTTTTTT**GTTG  
TAAGAACTGTATTTTCACCATAATTTTCATGAATAAATGAGTTTCTTCCCGCGGTGGTAAATTTGCCTTTACCCCGCGGAAAAACAACCTAG

RpoD-TTS (-up) ; CTAGATTC**TTGACA**TAAAAGTGGTATTAAAG**TACTTA**TTTACTCAAAGAAACGGAAATGGGGCGCCTTTTTTGTG  
TAAGAACTGTATTTTCACCATAATTTTCATGAATAAATGAGTTTCTTTGCCTTTACCCCGCGGAAAAACAACCTAG

RpoD-TTS (-down) ; CTAGATTC**TTGACA**TAAAAGTGGTATTAAAG**TACTTA**TTTACTCAAAGAAGGGCGCCACCATTAAACGGATTTTGTG  
TAAGAACTGTATTTTCACCATAATTTTCATGAATAAATGAGTTTCTTCCCGCGGTGGTAAATTTGCCAAAAACAACCTAG

RpoD-TTS (mut) ; CTAGATTC**TTGACA**TAAAAGTGGTATTAAAG**TACTTA**TTTACTCAAAGAAGGGCGCCACCATTAAACGGAAAT**ACATACAACA**TTTTTGTG  
TAAGAACTGTATTTTCACCATAATTTTCATGAATAAATGAGTTTCTTCCCGCGGTGGTAAATTTGCCTTTATGTATGTTGTAAAAACAACCTAG

(B)

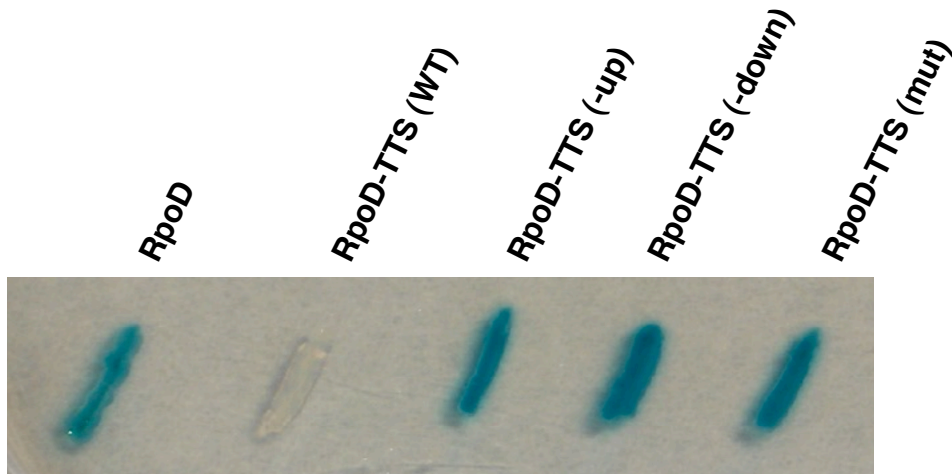

**Figure S5.** *lacZ* fusion assays for transcription termination signals. (A) Sequences of promoters used for *lacZ* fusion assays (Figure 10D). RpoD-dependent -35/-10 promoter elements are underlined with bold letters. The regions predicted to form the stem structure are underlined. Mutated nucleotides from the wild-type sequence are indicated in bold. (B) A picture of the strains grown on an X-gal plate (Figure 10D).

**Table S1.** Primers used in this study. Recognition sequences for restriction enzymes are underlined.

| Name                                   | Sequence                             | Enzyme  |
|----------------------------------------|--------------------------------------|---------|
| Primer extension assays                |                                      |         |
| NifH-PE                                | CCGTAGATCGCTACCTGTCTC                |         |
| GlnB-PE                                | ATCCAGCTTGAACGGTTTGATAATC            |         |
| GnfK-PE                                | TCCTTTTCTGCTATGTACTTC                |         |
| GnfR-PE                                | TCGTCGCATATAAGGACACTTC               |         |
| GdhA-PE                                | TGATAGATGCCCTGAAGTTTC                |         |
| Construction of EBP expression vectors |                                      |         |
| 0300-Fwd                               | TCTCATATGGGACAGCAGTGGGTCAAC          | NdeI    |
| 0300-Rev                               | TCTCTCGAGTGAAGAGACGTGGAAATTAC        | XhoI    |
| 0372-Fwd                               | TCTCATATGCCCGCAACCATACTGATC          | NdeI    |
| 0372-Rev                               | TCTCTCGAGCGGCCCTGGTCCCGGGTTATGCCGAA  | XhoI    |
| 0598-Fwd                               | TCTCATATGGAAAACATTGATGTACTTGTA       | NdeI    |
| 0598-Rev                               | TCAAGCTTGTTTCGTCATCTGGTTACGTAC       | HindIII |
| 0776-Fwd                               | TCTCATATGCTCAAGGCGAAAATACTCA         | NdeI    |
| 0776-Rev                               | TCTCTCGAGTTCGTCGTCGGCCGGGACGCCTC     | XhoI    |
| 0811-Fwd                               | TCTCATATGAACGAAACGATACTCGTCGTGGAC    | NdeI    |
| 0811-Rev                               | TCTCTCGAGTTTTTTAGCGTCGATCCCGTAAC     | XhoI    |
| 0963-Fwd                               | TCTCATATGCCGATCGTGTGAGATAAAAAGCGCA   | NdeI    |
| 0963-Rev                               | TCTCTCGAGGGCGTAGTCTTCGCGGCGGATA      | XhoI    |
| 1003-Fwd                               | TCTCATATGTTACTGAACCGCATATTGGT        | NdeI    |
| 1003-Rev                               | TCTCTCGAGGTCTTTTCTCAGTTCGATGCCCA     | XhoI    |
| 1129-Fwd                               | TCTCATATGAAAGAGCGGACCAAATCC          | NdeI    |
| 1129-Rev                               | TCAAGCTTGAGCGGCATGCCGAGCCGCCGCATC    | HindIII |
| 1320-Fwd                               | TCTCATATGGCTGAAGAGCGGCAACCT          | NdeI    |
| 1320-Rev                               | TCTCTCGAGTTTTTTTCTCTCCGGTGCAGTGATC   | XhoI    |
| 1495-Fwd                               | TCTCATATGGAAATTCATGTTCTCGTA          | NdeI    |
| 1495-Rev                               | TCTCTCGAGCTCCTCATCCATGCCAAATTTTGCCA  | XhoI    |
| 1940-Fwd                               | TCTCATATGGAAAACTGCTGATCGTC           | NdeI    |
| 1940-Rev                               | TCTCTCGAGCCCCTTATCCCGTGTTTTTTTCATCA  | XhoI    |
| 2041-Fwd                               | TCTCATATGAAAAAGCGGATACTGGTC          | NdeI    |
| 2041-Rev                               | TCTCTCGAGATCGATGCCGAATTCCTTGAGCTTGTA | XhoI    |
| 2915-Fwd                               | TCTCATATGAGAAAGACAAAGATACTGGT        | NdeI    |
| 2915-Rev                               | TCAAGCTTTTTAAGGAAGCCGAACCTTCTTCA     | HindIII |
| 3363-Fwd                               | TCTCATATGGAGCCGATAATTACCGAC          | NdeI    |
| 3363-Rev                               | TCAAGCTTTTGTCTGTCCCCCTGCGGCATATC     | HindIII |
| Promoter for DNA-binding assays        |                                      |         |
| GnfK-Pro1                              | CGAGATCATGGGCCTCGAC                  |         |
| GnfK-Pro2                              | AGAACGAAGATGTTATATA                  |         |
| NifH-Pro1                              | TTGCCGAGGCGATTCTGCTGAC               |         |
| NifH-Pro2                              | AGCAACACACTGAATTAAC                  |         |
| GlnB-Pro1                              | AAGCGTGATGCAGAACTGTC                 |         |
| GlnB-Pro2                              | TAAACAGAGAGAAAAATCCAAC               |         |
| GdhA-Pro1                              | ATCCTCCCATCATCGTGGTC                 |         |
| GdhA-Pro2                              | TGATAGATGCCCTGAAGTTTC                |         |
| 3409-Pro1                              | TGTATGTAATTTAAATGCA                  |         |
| 3409-Pro2                              | GTGCCACAGTGAAAAAC                    |         |
| Probe for footprint assays             |                                      |         |
| GnfK-F1                                | TCTCTAGACGAGATCATGGGCCTCGAC          |         |

GnfK-F2 TCGGATCCGTTAGGCACGAGGCA  
 GdhA-F1 TCTCTAGACAACAACCGGTCCGTCCA  
 GdhA-F2 TCGGATCCCCTGATTAATAATGTAGACA

lacZ fusion assays

gnfK

-243T TCTCTAGACGAGATCATGGGCCTCGAC  
 -111T TCGAATTCGACTGGTATTGAAAAAGC  
 -88T TCGAATTCTTAATCGAGGTGACGGCCGGTC  
 -129B TCGAATTCACAAAAGAAAAGCCGCC  
 -106B TCGAATTCTGCCCAATATTTTCAGCA  
 +32B AGCGCATTTGCCATGGGTCAC

gdhA

WT12T CTAGAAAATTTGCCGATAAATCAGGCAATTGCCACCTCAACA  
 WT12B CGTGATGTTGAGGTGGGCAATTGCCTGATTTATCGGCAAATTTT  
 WT34T TCACGCCATGCACAGTTTTGGTGCAGTACGTGCATAAAATGCAGGCAATCG  
 WT34B GATCCGATTGCCTGCATTTTATGCACGTACTGCACCAAACTGTGCATGG  
 Mut34T TCACGCCAATGTACGTTTTGGTGCAGTACGTGCATAAAATTACTTATATCG  
 Mut34B GATCCGATATAAGTAATTTTATGCACGTACTGCACCAAAACGTACATTGG

Construction of pCDNdeII

NdeI-Fwd AATTGACTGACTGAGAAGGAGATATACATATGCCCTCGAGTCTAGAG  
 NdeI-Rev AATTCTCTAGACTCGAGGGCATATGTATATCTCCTTCTCAGTCAGTC

Construction of overexpression vectors for GnfL-K and GnfM in *Geobacter*

GnfLK-Fwd CTCAGATCTGAATTCATGCTTCCTCACGGCGAAAC BglIII, EcoRI  
 GnfLK-Rev TCTCTAGACTACTGAATCAGGGGGAGCATC XbaI  
 GnfM-Fwd TCTCATATGTTACTGAACCGCATATTGGT NdeI  
 GnfM-Rev TCTCTCGAGAAGCTTCAGTCTTTTCTCAGTTCGA XhoI, HindIII

Construction of overexpression vectors for GnfL-K and GnfM in *E. coli*

GnfLK-Fwd TCTCATATGCTTCCTCACGGCGAAAC NdeI  
 GnfLK-Rev TCAAGCTTCTGAATCAGGGGGAGCATCAC HindIII  
 GnfM-Fwd TCTCATATGTTACTGAACCGCATATTGGT NdeI  
 GnfM-Rev TCTCTCGAGGTCTTTTCTCAGTTCGATGCCCA XhoI

Construction of mutants

GnfK-D1 TCTCTAGATGATCGCCGAATGGATCCAC XbaI  
 GnfK-D2 TCGAATTCCTTTTCTGCTATGTACTTC EcoRI  
 GnfK-D3 TCTAAGCTTCATTCGCACCAGCCAGAAC HindIII  
 GnfK-D4 TCGGATCCATAACCGGTTGGTAGACC BamHI  
 GnfR-D1 TCGGATCCTCGCGCCTGAAGAGCGCCTC BamHI  
 GnfR-D2 ACGTCGGGAAGCTTGGCAAAC HindIII  
 GnfR-D3 TCGAATTCACGGAGCCC GAAGCGTTCCGCA EcoRI  
 GnfR-D4 TCTCTAGAAGCCGACCTTGAGCACGTCC XbaI  
 Km-Fwd GCATGAGAATTCCTGACGGAACAGCGGGAAGTCCAGC EcoRI  
 Km-Rev GCTATGAAGCTTTCATAGAAGGCGGCGGTGGAATCGAA HindIII

Primer extension assays

NifH-R1 CCTGCGTTCAGCAGCGAATAC  
 NifH-R2 CCGTAGATCGCTACCTGTCTC

GlnB-PE ATCCAGCTTGAACGGTTTGATAATC

Overexpression of GnfK and GnfR

|          |                                    |      |
|----------|------------------------------------|------|
| GnfK-Fwd | TCTCATATGGCAAATGCGCTTGCGAAGTA      | NdeI |
| GnfK-Rev | TCTCTCGAGCTCGGCTGCGACAAAGGTGAGCGTA | XhoI |
| GnfR-Fwd | TCTCATATGATTTTAGTGCGAAGTGTCCTTA    | NdeI |
| GnfR-Rev | TCTCTCGAGCGCTTCGGTCAGCAGAATCGCCTC  | XhoI |

---



**Table S2.** Alignment of the RpoN-dependent -24/-12 promoter elements of the nitrogen-fixation genes. The -24/-12 promoter elements for *nifH*, *glnB*, *gnfK*, *gnfR*, and *gdhA* of *G. sulfurreducens* were assigned from the transcription initiation sites determined by the primer extension assays (Figure 1A). Other -24/-12 promoter elements were identified by comparing the promoter regions of the nitrogen-fixation genes. It is likely that the *glnB* operon contains *glnA*, the *nifEN* operon contains *nifEN* and *nifX* in this order, the Gsul\_0938 homologue operon contains a gene encoding a hypothetical protein, *glnK* and *amtB* in this order, and the Gsul\_2799 homologue operon contains genes encoding a putative radical SAM domain protein and a putative acetyltransferase. Highly conserved dinucleotides GG and GC in RpoN-dependent -24/-12 promoter elements are indicated by bold letters. Gsul; *G. sulfurreducens*, Gmet; *G. metallireducens*, Gura; *G. uraniireducens*.

| Gene       | -24                                        | -12 |
|------------|--------------------------------------------|-----|
| Gsul_nifH  | GGTT <b>GG</b> CATGGACGGT <b>GCT</b> TATA  |     |
| Gmet_nifH  | TTTT <b>GG</b> CACGGTCAGT <b>GCT</b> TTTA  |     |
| Gura_nifH  | AGTT <b>GG</b> CATGGTCAAT <b>GCT</b> TAAA  |     |
| Gsul_nifEN | GATT <b>GG</b> CACGTGGGGT <b>GCA</b> AAAG  |     |
| Gmet_nifEN | CCTT <b>GG</b> CACGTCACCT <b>GCT</b> TAAC  |     |
| Gura_nifEN | GATT <b>GG</b> CACGGCAAAT <b>GCT</b> CAA   |     |
| Gsul_nifV  | GCCT <b>GG</b> CACGGCTCGT <b>GCT</b> AAT   |     |
| Gmet_nifV  | GCGT <b>GG</b> CACGCCTTGT <b>GCT</b> TTTA  |     |
| Gura_nifV  | TACT <b>GG</b> CATGCCTATT <b>GCT</b> TGA   |     |
| Gsul_glnB  | TTTAG <b>GG</b> CAGACTATTT <b>GCT</b> TTT  |     |
| Gmet_glnB  | TTT <b>GG</b> GCAAAGTATTT <b>GCT</b> TTG   |     |
| Gura_glnB  | TCTT <b>GG</b> CAGATAATTT <b>GCT</b> TATA  |     |
| Gsul_0938  | GAGT <b>GG</b> CACGGCCTAT <b>GCT</b> TAAA  |     |
| Gmet_0693  | TGAT <b>GG</b> CATGCCTTAT <b>GCT</b> AAT   |     |
| Gura_3367  | ATGT <b>GG</b> CACGGCTTGT <b>GCT</b> TTT   |     |
| Gsul_gnfK  | TTCT <b>GG</b> CATGCCTCGT <b>GC</b> CTAA   |     |
| Gmet_gnfK  | TTCT <b>GG</b> CACGCCTCGT <b>GC</b> CTAC   |     |
| Gura_gnfK  | TGTT <b>GG</b> CATGACTTAT <b>GC</b> CTTT   |     |
| Gsul_gnfR  | GATT <b>GGA</b> ACACTTTAT <b>GCT</b> GAA   |     |
| Gmet_gnfR  | CCTT <b>GGA</b> ACGGTTTAT <b>GCT</b> GAA   |     |
| Gura_gnfR  | GATT <b>GGA</b> ATGGTTCGT <b>GCT</b> TTT   |     |
| Gsul_2799  | TTGT <b>GG</b> CACGCTTAGT <b>GTT</b> AAG   |     |
| Gmet_0681  | TTCT <b>GG</b> CACGCTTAAT <b>GC</b> CATA   |     |
| Gura_1209  | ATCT <b>GG</b> CACGCTTCAT <b>GTT</b> AAT   |     |
| Gsul_gdhA  | TTTT <b>GGT</b> GCAGTACGT <b>GC</b> CATAA  |     |
| Gmet_gdhA  | TTTT <b>GGT</b> GCACCCTCT <b>GC</b> CATAT  |     |
| Gura_gdhA  | TTAT <b>GGT</b> GCACCTATGT <b>GC</b> CATAT |     |

**Table S3.** Conservation of EBPs in *Geobacter* species. Presence and absence of homologues of *G. sulfurreducens* EBPs are indicated by + and -, respectively.

| <i>sulfurreducens</i> | <i>metallireducens</i> | <i>uraniireducens</i> |
|-----------------------|------------------------|-----------------------|
| GSU0280 (EBP1)        | -                      | -                     |
| GSU0300 (EBP2)        | +                      | +                     |
| GSU0359 (EBP3)        | +                      | -                     |
| GSU0372 (EBP4)        | +                      | +                     |
| GSU0470 (EBP5)        | -                      | +                     |
| GSU0598 (EBP6)        | +                      | +                     |
| GSU0776 (EBP7)        | +                      | +                     |
| GSU0811 (EBP8)        | +                      | +                     |
| GSU0841 (EBP9)        | -                      | +                     |
| GSU0963 (EBP10)       | +                      | +                     |
| GSU1003 (EBP11)       | +                      | +                     |
| GSU1039 (EBP12)       | -                      | -                     |
| GSU1129 (EBP13)       | +                      | +                     |
| GSU1250 (EBP14)       | -                      | +                     |
| GSU1320 (EBP15)       | +                      | +                     |
| GSU1495 (EBP16)       | +                      | +                     |
| GSU1653 (EBP17)       | -                      | +                     |
| GSU1940 (EBP18)       | +                      | +                     |
| GSU1989 (EBP19)       | +                      | -                     |
| GSU2041 (EBP20)       | +                      | +                     |
| GSU2506 (EBP21)       | -                      | -                     |
| GSU2524 (EBP22)       | -                      | +                     |
| GSU2581 (EBP23)       | -                      | -                     |
| GSU2753 (EBP24)       | -                      | +                     |
| GSU2915 (EBP25)       | +                      | +                     |
| GSU3217 (EBP26)       | -                      | +                     |
| GSU3363 (EBP27)       | +                      | +                     |
| GSU3418 (EBP28)       | -                      | +                     |

**Table S4.** Predicted GnfM-binding sites. The sequences were identified by comparing the promoter regions of the nitrogen-fixation genes. It is likely that the *glnB* operon contains *glnA*, the *nifEN* operon contains *nifEN* and *nifX* in this order, the Gsul\_0938 homologue operon contains a gene encoding a hypothetical protein, *glnK* and *amtB* in this order, and the Gsul\_2799 homologue operon contains genes encoding a putative radical SAM domain protein and a putative acetyltransferase. Highly conserved dinucleotides GG and GC in RpoN-dependent -24/-12 promoter elements are indicated by bold letters. Gsul; *G. sulfurreducens*, Gmet; *G. metallireducens*, Gura; *G. uraniireducens*.

| Gene/operon | sequence           |
|-------------|--------------------|
| Gsul_nifH   | TGATTAATTGTTGTGCA  |
| Gsul_nifH   | TGCATGGGAAAGAGGCG  |
| Gmet_nifH   | TGGCTATTCCTTGAGCA  |
| Gmet_nifH   | TGAACAGGAAAGAGGCG  |
| Gura_nifH   | TGATTAATATTGTGCA   |
| Gura_nifH   | TGCTGACCGATAAAGCG  |
| Gsul_nifEN  | TGAGCAAATCCATCCCG  |
| Gmet_nifEN  | TGCATAAAATGTGTGCA  |
| Gura_nifEN  | TGCCCCAATAATTGGGCA |
| Gsul_nifV   | TGCCCGATATTTGGGCA  |
| Gmet_nifV   | TGTTTATAAAACAGTCA  |
| Gura_nifV   | TGTGTAAAAAAGAGGCA  |
| Gsul_glnB   | TGCTCATTTGGTATGCA  |
| Gsul_glnB   | TGCCTTTATTTTGTGCT  |
| Gmet_glnB   | TGCTTCTGATTTGTGCA  |
| Gmet_glnB   | TGCCTTATTTTGTGAGCT |
| Gura_glnB   | TGCCCATCCATTGGGCA  |
| Gura_glnB   | TGCTCAATTTATAAGCT  |
| Gsul_0938   | TGATGCGCTGATGTTCA  |
| Gsul_0938   | TGCATAAATAATGGGCA  |
| Gmet_0693   | TGCTTATATAATGTGCA  |
| Gmet_0693   | TGGAGGTGGCGTAAGCG  |
| Gura_3367   | TGCCTGGAAATGAAACG  |
| Gura_3367   | TGCATAAAAAATAATCA  |
| Gsul_gnfK   | TGCTGAAATATTGGGCA  |
| Gsul_gnfK   | TGATTGAAAAGCGGCA   |
| Gmet_gnfK   | TGCCTCAATTGTGGGCG  |
| Gmet_gnfK   | TGCCTAAATGGTGTGCA  |
| Gura_gnfK   | TGCGCTATTTGTGGGCA  |
| Gura_gnfK   | TGCATGCTTTTTTCAGCA |
| Gsul_gnfR   | TGAAGCCCAGTTCCACA  |
| Gsul_gnfR   | TGCCCGAAACCCTGACA  |
| Gmet_gnfR   | TGAAGCTCACCTCCACC  |
| Gmet_gnfR   | TGGTTCTGAAACGGCA   |
| Gura_gnfR   | TGAAGCTCGCCTCCACG  |
| Gura_gnfR   | TGCCCGAAACATGAACG  |
| Gsul_2799   | TGCCCCAGCGATCCTCA  |
| Gsul_2799   | TGCCCAACAATTAGTCA  |

|           |                   |
|-----------|-------------------|
| Gmet_0681 | TGGTGGAAGGTGCTGCA |
| Gmet_0681 | TGCCTGTTTTTTAATCC |
| Gura_1209 | TGCCGGTAAGGGATGCA |
| Gura_1209 | TGCTAAATATTAATCA  |
| Gsul_gdhA | TGCCGATAAATCAGGCA |
| Gsul_gdhA | TGCCCACCTCAACATCA |
| Gsul_gdhA | TGCACAGTTTTGGTGCA |
| Gsul_gdhA | TGCATAAAATGCAGGCA |
| Gmet_gdhA | TGCCGCAAATTCGGGCA |
| Gmet_gdhA | TGCCTCTTTATGCATCG |
| Gmet_gdhA | GCGCATTTTTTGGTGCA |
| Gmet_gdhA | TGCATATATAAGTGGCG |
| Gura_gdhA | TGACTAAATAATACGCA |
| Gura_gdhA | TGTGCACGTTAAGTGCT |
| Gura_gdhA | TGCCTATTTATGGTGCA |
| Gura_gdhA | TGCATATTATTTAATCG |

---

## Reference

1. Schumacher,J., Joly,N., Rappas,M., Zhang,X. and Buck,M. (2006) Structures and organisation of AAA+ enhancer binding proteins in transcriptional activation. *J. Struct. Biol.*, **156**, 190-199.
